# Supplementary material for: BALCONY: an R package for MSA and functional compartments of protein variability analysis
Source: PubMed Central journal article supplement (PMC6092823; doi:10.1186/s12859-018-2294-z), 2018-08-14
Supplement: 12859_2018_2294_MOESM1_ESM.pdf [file 12859_2018_2294_MOESM1_ESM.pdf]

# BALCONY Supplementary Materials

*Alicja Płuciennik, Michał Stolarczyk, Maria Bzówka, Agata Raczyńska, Tomasz Magdziarz,  
Artur Góra*

*June 5, 2018*

```
#Structure 4JNC
#res AA property
99 ASP 39163
147 TYR 39163
148 GLN 1
288 HIP 39163
127 ILE 555
145 PHE 39162
103 MET 44
```

Figure S1: Example of a structure file. This is plane text file comprising two or three column table. The first and the second columns are numbers of residues and residues nales respectively. Thirds column can be used to provide additional numeric data describing particular structural feature, here it is propensity of being tunnel building amino acids obtained with CAVER 3.02 software.

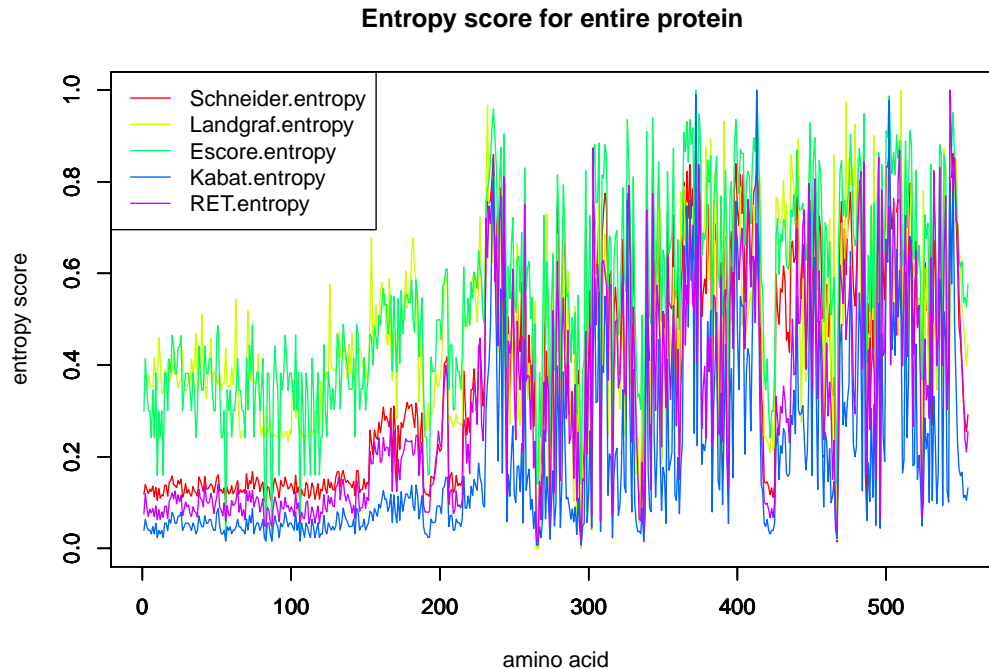

Figure S2: Plot shows the entropy (conservation) of the protein being analysed. Conservation is drastically different among regions. Additionally, it shows the differences in entropy scoring according to metrics used.

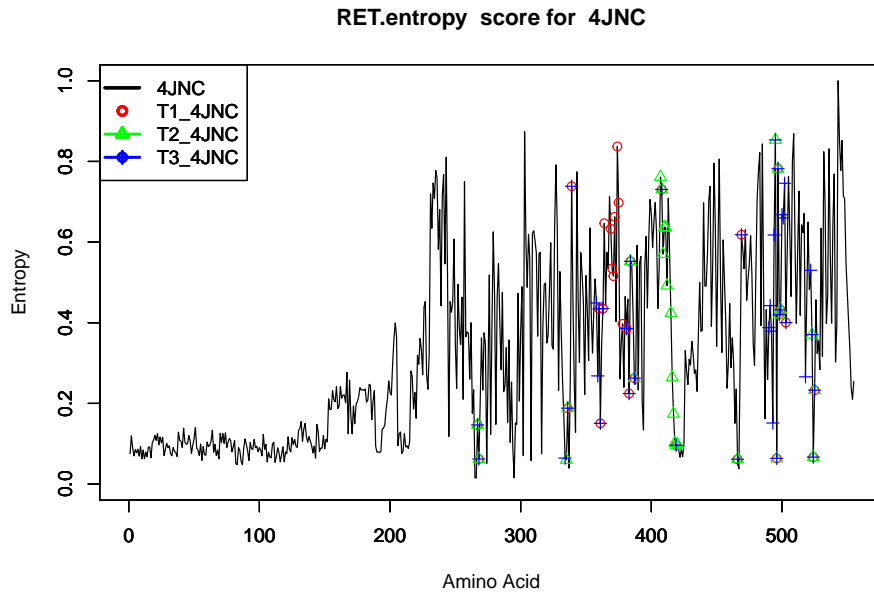

Figure S3: Plot shows the entropy (conservation) of the protein with the amino acids building structure marked on one. It facilitates the visual inspection of the chosen structural conservation in comparison with entire protein.

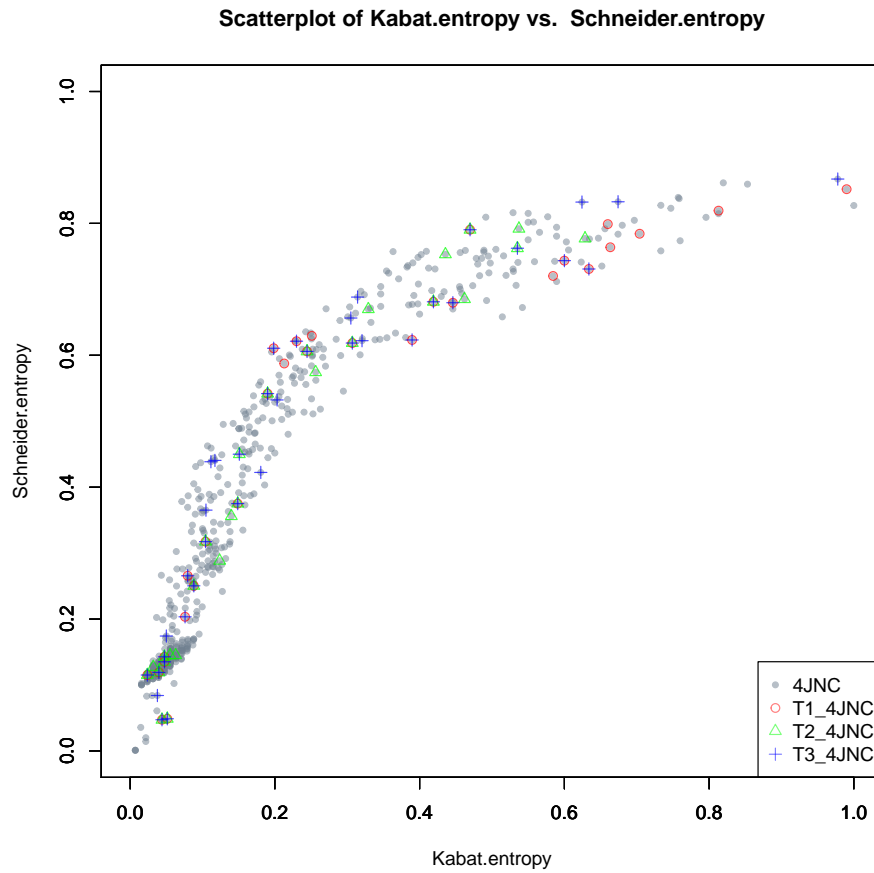

Figure S4: Scatterplot shows the relationship between a specified pair of entropy metrics.

Table S1: A sample of output CSV file.

|                    |                   |                   |                   |                   |
|--------------------|-------------------|-------------------|-------------------|-------------------|
| alignment_position | 1282              | 1283              | 1284              | 1285              |
| AA name            | I                 | W                 | G                 | E                 |
| Percentage         | 44.9511           | 31.9218           | 85.9935           | 33.5505           |
| AA name            | L                 | T                 | A                 | D                 |
| Percentage         | 28.6645           | 15.3094           | 9.772             | 25.7329           |
| AA name            | V                 | A                 | S                 | T                 |
| Percentage         | 17.9153           | 12.7036           | 2.9316            | 14.0065           |
| AA name            | M                 | V                 | -                 | A                 |
| Percentage         | 4.5603            | 9.772             | 0.6515            | 6.5147            |
| AA name            | C                 | H                 | T                 | S                 |
| Percentage         | 1.6287            | 8.1433            | 0.3257            | 5.5375            |
| AA name            | A                 | R                 | V                 | G                 |
| Percentage         | 1.3029            | 7.8176            | 0.3257            | 3.9088            |
| AA name            | -                 | G                 | n                 | K                 |
| Percentage         | 0.9772            | 3.2573            | n                 | 2.9316            |
| AA name            | n                 | n                 | n                 | n                 |
| Percentage         | n                 | n                 | n                 | n                 |
| AA name            | n                 | n                 | n                 | n                 |
| Percentage         | n                 | n                 | n                 | n                 |
| sequence           | v                 | t                 | a                 | e                 |
| structure_1        | N                 | N                 | N                 | N                 |
| structure_2        | N                 | N                 | N                 | N                 |
| structure_3        | N                 | N                 | N                 | N                 |
| structure_4        | N                 | N                 | N                 | N                 |
| Structure numbers  | 491               | 492               | 493               | 494               |
| Schneider.entropy  | 0.438591455673143 | 0.688262034287571 | 0.174279963001664 | 0.622135015478849 |
| Landgraf.entropy   | 0.49936352313306  | 0.900264918232074 | 0.200679023336388 | 0.578733972365186 |
| Escore.entropy     | 0.525492510473891 | 0.751981459665551 | 0.356760588984607 | 0.756924602279168 |

Table S2: Summary of grouping used in BALCONY.

| class | Substitution matrix | class | Size        | class | Polarity and charges | class | Aromaticity |
|-------|---------------------|-------|-------------|-------|----------------------|-------|-------------|
| G1    | A P S T             | G1    | A G S       | G1    | W S T Y N K          | G1    | F W H Y     |
| G2    | R Q E K             | G2    | V C D N T P | G1A   | H R K                | G2    | others      |
| G3    | N D G H             | G3    | others      | G1B   | E D                  |       |             |
| G4    | I L M V             |       |             | G2    | others               |       |             |
| G5    | F V Y               |       |             |       |                      |       |             |
| G6    | C                   |       |             |       |                      |       |             |
